# Supplementary material
Source: MDPI journal article supplement (https://www.mdpi.com/2072-4292/12/11/1815)
Supplement: s1 [file s1]

Supplementary Materials

# Recent Shrinkage and Fragmentation of Bluegrass Landscape in Kentucky

**Bo Tao<sup>1</sup>, Yanjun Yang<sup>1</sup>, Jia Yang<sup>2</sup>, Ray Smith<sup>1</sup>, Fox James<sup>3</sup>, Ruane Alex C.<sup>4</sup>, Jinze Liu<sup>5</sup>, Wei Ren<sup>\*1</sup>**

<sup>1</sup> Department of Plant and Soil Sciences, College of Agriculture, Food and Environment, University of Kentucky, KY 40546, USA;

bo.tao@uky.edu

<sup>2</sup> Department of Forestry, Mississippi State University, MS 39762, USA; Department of Forestry, University of Kentucky, KY 40546, USA;

<sup>3</sup> Civil Engineering Department, University of Kentucky, Lexington, KY 40506, USA;

<sup>4</sup> Goddard Institute for Space Studies, National Aeronautics and Space Administration, New York, 10025, USA;

<sup>5</sup> Laboratory for High Performance Scientific Computing and Computer Simulation, Department of Computer Science, University of Kentucky, Lexington, KY 40506, USA;

\*Correspondence: Wei Ren, wei.ren@uky.edu, Tel.: +1-859-257-1953; Department of Plant & Soil Sciences, College of Agriculture, Food, and Environment University of Kentucky, KY, USA

*To be submitted to Remote Sensing*

April 2020

**Table S1.** Conversions between various fragmentation categories between 2008-2018

|              | <b>Area in<br/>2008<br/>(1000 ha)</b> | <b>Interior</b> | <b>Patch</b> | <b>Transitional</b> | <b>Edge</b> | <b>Perforated</b> | <b>Exterior</b> |
|--------------|---------------------------------------|-----------------|--------------|---------------------|-------------|-------------------|-----------------|
| Interior     | 262.9                                 | 67.9%           | 0.5%         | 1.1%                | 4.1%        | 16.1%             | 10.2%           |
| Patch        | 54.8                                  | 0.2%            | 38.7%        | 3.9%                | 0.7%        | 0.7%              | 55.8%           |
| Transitional | 130.6                                 | 0.3%            | 17.4%        | 43.2%               | 3.4%        | 3.0%              | 32.7%           |
| Edge         | 226.1                                 | 1.2%            | 1.9%         | 12.5%               | 59.0%       | 11.2%             | 14.1%           |
| Perforated   | 367.1                                 | 8.4%            | 1.4%         | 7.0%                | 13.5%       | 54.9%             | 14.7%           |
| Exterior     | 1179.0                                | 0.4%            | 0.5%         | 0.6%                | 0.5%        | 1.1%              | 96.9%           |

**Figure S1:** Groundwater sensitivity regions of the Bluegrass Region (modified from the map of Groundwater Sensitivity Regions of Kentucky [1])

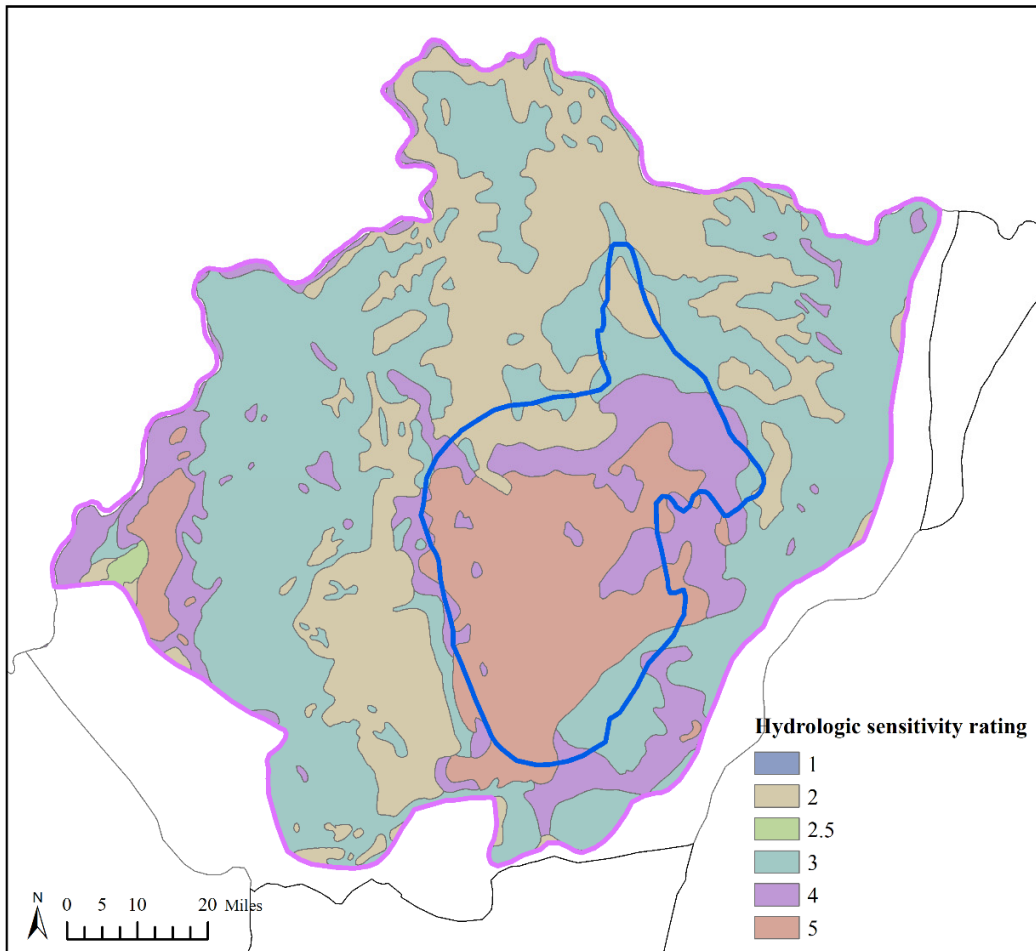

**Figure S2:** Map of physiographic regions in Kentucky [2]

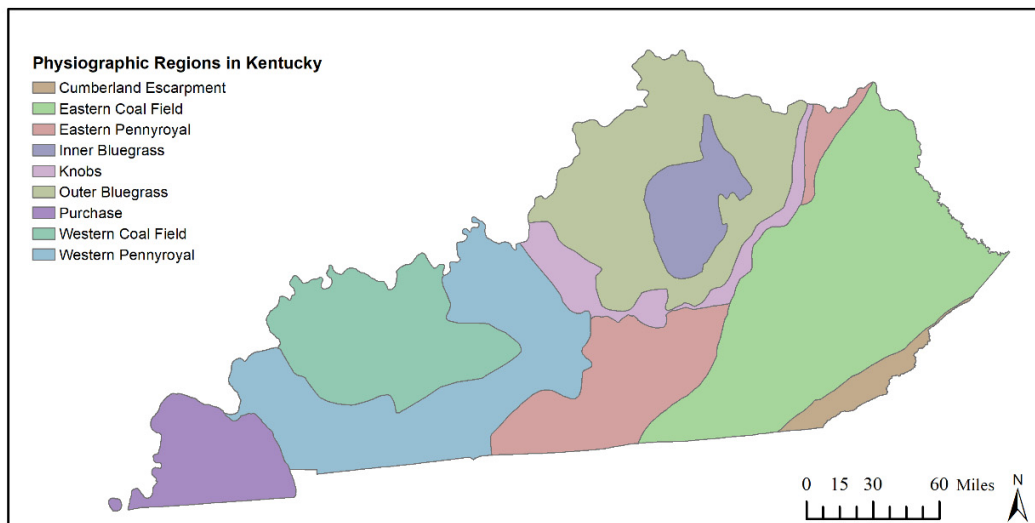

**References:**

1. Ray, J.A.; Webb, a.S.; O'dell, P.W. Groundwater sensitivity regions of Kentucky. Kentucky Department for Environmental Protection—Division of Water—Groundwater Branch. 1:500,000. **1994**.
2. Survey), K.K.G. Physiographic diagram of Kentucky. Publication number 1786. University of Kentucky, Lexington, KY. Available at <https://www.uky.edu/KGS/geoky/physiographic.htm>, accessed April 2020. **2001**.
